# Supplementary material for: Increase Paclitaxel Sensitivity to Better Suppress Serous Epithelial Ovarian Cancer via Ablating Androgen Receptor/Aryl Hydrocarbon Receptor-ABCG2 Axis
Source: MDPI journal article supplement (doi:10.3390/cancers11040463), 2019-04-02
Supplement: s1 [file s1]

## Supplementary information

### Supplementary Tables

**Table S1.** The qRT-PCR primer sequences for mRNA expression

| Primer name | sequences                                                               |
|-------------|-------------------------------------------------------------------------|
| AR          | F: 5'-TgTCCATCTTgTCgTCTTC-3'<br>R: 5'-CCTCTCCTTCCTCCTgTAg-3'            |
| AhR         | F: 5'-CCACTTCAgCCACCATCCAT-3'<br>R: 5'-AAgCAggCgTgCATTAgACT-3'          |
| ABCG2       | F: 5'-gggTTCTCTTCTTCCTgACgACC-3'<br>R: 5'-TggTTgTgA gATTgACCAACAgACC-3' |

**Table S2.** The PCR primers sequencing for ABCG2 promoter region amplification

| Primer name | location    | sequences                                                                            |
|-------------|-------------|--------------------------------------------------------------------------------------|
| Full length | -3268/+362  | F:5'gAgCTCgCAgCCTTgAACCCCggggCTCAAgC3'<br>R:5'gggAAgCTTgCACggTgCgTTCCTAAATCCTACCC3'  |
| 1F1R        | -3268/-1396 | F:5'gAgCTCgCAgCCTTgAACCCCggggCTCAAgC3'<br>R:5'gggAAgCTTggCCgTTAATgACTgTTTgCAAAAAC3'  |
| 2F4R        | -1396/+362  | F:5'gAgCTCAgTTTTTgCAAACAgTCATTAACggCC3'<br>R:5'gggAAgCTTgCACggTgCgTTCCTAAATCCTACCC3' |
| 3F4R        | -959/+362   | F:5'gAgCTCAATTTTACCCAAATgTTTgggCgCA3'<br>R:5'gggAAgCTTgCACggTgCgTTCCTAAATCCTACCC3'   |
| 4F4R        | -523/+362   | F:5'gAgCTCTTCATTCAgTAAgTTTCTCCCCTTTCC3'<br>R:5'gggAAgCTTgCACggTgCgTTCCTAAATCCTACCC3' |

**Table S3.** The qRT-PCR primer sequences for ChIP assay

| Primer name | sequences                        |
|-------------|----------------------------------|
| ChIPR1.2F   | F: 5'-gACTTggAACCAACCCAAATg-3'   |
| ChIPR1.2R   | R: 5'-TCCCTACAAAaggACATgAACTC-3' |
| ChIPR2.5F   | F: 5'-ggCCTTTAAgggTCTTgAAACTg-3' |
| ChIPR2.5R   | R: 5'-TggTTCACCCAATgCAggAAA-3'   |
| ChIPR3.4F   | F: 5'-gCCTTTCCACACCATCggA-3'     |
| ChIPR3.4R   | R: 5'-AggAAAgggggAgAACTTACTg-3'  |

**Table S4.** IC<sub>50</sub> of AR-manipulated EOC cells under paclitaxel treatment (\* p < 0.05)

| Cell line | Manipulation   | IC <sub>50</sub>  |
|-----------|----------------|-------------------|
| Hey A8    | Vector control | 0.0059 ±0.004 µM* |
|           | hAR            | 0.024 ±0.019 µM*  |
|           | siAR           | 0.0011 ±0.0002 µM |
| SKOV3ip1  | Vector control | 0.003 ±0.002 µM*  |
|           | hAR            | 0.008 ±0.001 µM*  |
|           | siAR           | 0.0025 ±0.002 µM  |
| OVCAR3    | Vector control | 0.001 µM*         |
|           | hAR            | 0.009 ±0.002 µM*  |
|           | siAR           | 0.001 µM          |

**Table S5.** IC<sub>50</sub> of EOC cells treated by paclitaxel combined with ASC-J9 or MDV3100

| Cell line | treatments                 | IC <sub>50</sub>    |
|-----------|----------------------------|---------------------|
| Hey A8    | Paclitaxel                 | 0.0063 ± 0.003 µM   |
|           | Paclitaxel/<br>10 µM MDV   | 0.0051 ± 0.0028 µM  |
|           | Paclitaxel/<br>5 µM ASC-J9 | 0.0016 ± 0.0005 µM  |
| SKOV3ip1  | Paclitaxel                 | 0.0058 ± 0.0007 µM  |
|           | Paclitaxel/<br>10 µM MDV   | 0.0054 ± 0.0005 µM  |
|           | Paclitaxel/<br>5 µM ASC-J9 | 0.002 ± 0.001 µM    |
| OVCAR3    | Paclitaxel                 | 0.002 ± 0.001 µM    |
|           | Paclitaxel/<br>10 µM MDV   | 0.0027 ± 0.0003 µM  |
|           | Paclitaxel/<br>5 µM ASC-J9 | 0.0007 ± 0.00026 µM |

## Supplementary figures

Supplementary Figure S1. Chung et al

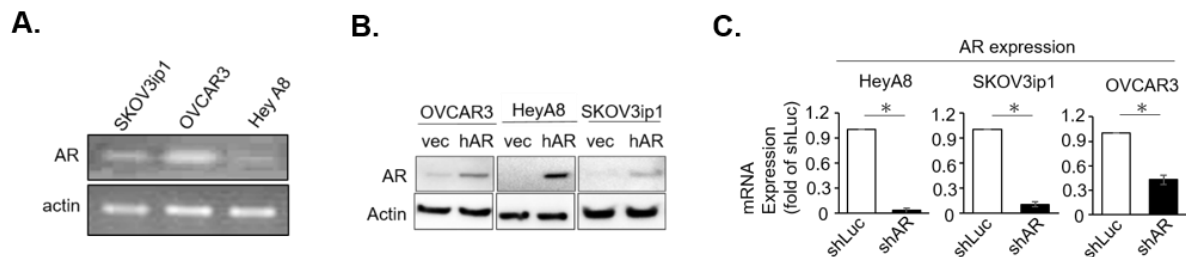

**Supplementary Figure S1. AR expression and association with paclitaxel sensitivity and resistance.** **(A)** Basal expression of AR mRNA in three serous type cells. Actin was used as an internal control. **(B)** Overexpression of AR in three EOC serous subtype cell lines. Cells were infected with either pWPI vector control or pWPI-hAR plasmids to establish AR-stable clones. Cells with AR overexpression were then lysed to perform western blotting. Total protein was loaded at 40µg/lane and AR antibody was used to detect AR expression. Actin was used as an internal control. **(C)** Cells were infected with either pLKO.1-shLuc vector control or pLKO.1-shAR plasmids to establish AR-knockdown stable clones. Knockdown of AR expression in EOC serous subtype cells. RNA was extracted and cDNA was synthesized using 5µg of total RNA. AR expression was determined using qRT-PCR. Actin was used as an internal control. Results of mRNA expression were calculated by  $2^{-\Delta\Delta C_t}$  and normalized by shLuc.

[illegible]

**Supplementary Figure S2. Nucleotide sequences of the 5' flanking promoter region of the human ABCG2 gene.** ABCG2 promoter region nucleotide sequences were obtained from NCBI database (accession no. NC\_018915). Transcription start site was indicated as +1.

Supplementary Figure S3, Chung et al.

**A.**

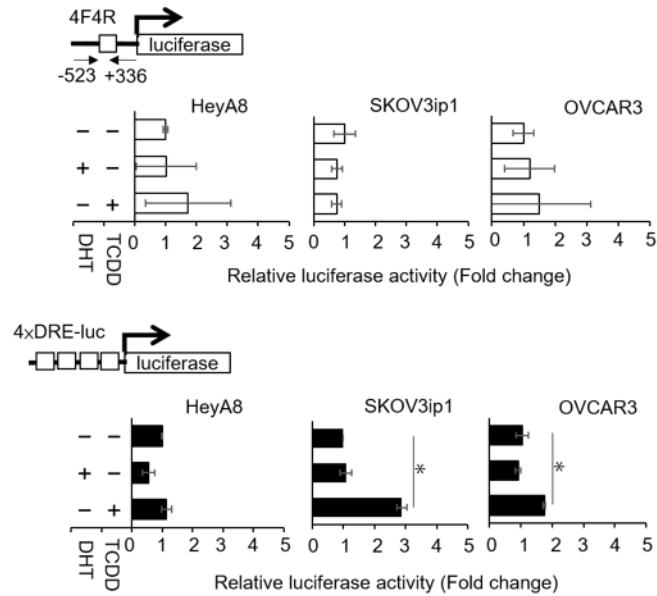

**B.**

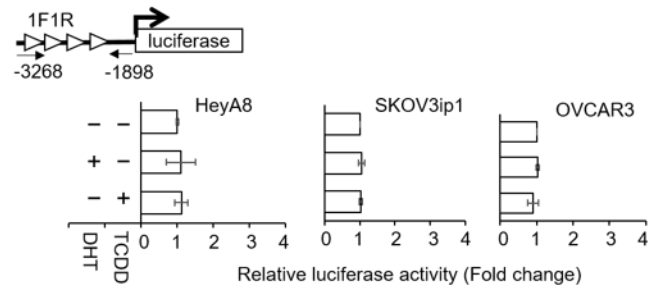

**C.**

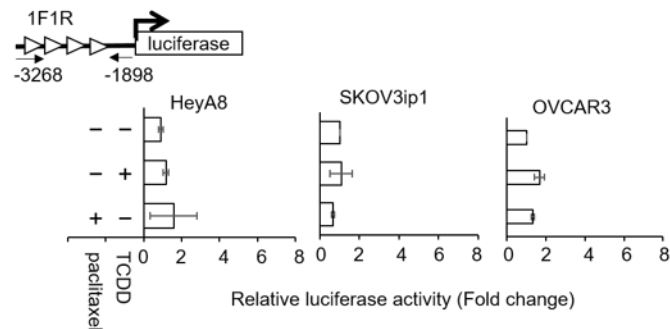

**Supplementary Figure S3. Luciferase activity of the human ABCG2 5'-promoters. (A)**

4F4R luciferase activity cannot be induced under TCDD or DHT treatment in EOC cells.

Upper panel: 4F4R and pRL-TK were co-transfected into three serous type cells and treated



with DMSO,  $10^{-8}$  M DHT, or 5nM TCDD. The core DRE region is indicated as  $\square$ . Results were the fold changes in response to DMSO treatment. Down panel: 4xDRE-luc plasmid under the same treatments served as a positive control. **(B)** 1F1R luciferase activity cannot be induced under TCDD or DHT treatment in EOC cells. 1F1R and pRL-TK were co-transfected into three serous type cells and treated with DMSO,  $10^{-8}$  M DHT, or 5nM TCDD. The putative ARE is indicated as  $\triangleright$ . Results were the fold changes in response to DMSO treatments. **(C)** 1F1R luciferase activity cannot be induced under TCDD or paclitaxel treatment in EOC cells. 1F1R and pRL-TK were co-transfected into three serous type cells and treated with DMSO, 2nM paclitaxel, or 5nM TCDD.
